# Supplementary material for: Expression and correlation of COX-2 and NUCB1 in colorectal adenocarcinoma
Source: PeerJ. 2023 Jul 31;11:e15774. doi: 10.7717/peerj.15774 (PMC10399562; doi:10.7717/peerj.15774)
Supplement: Supplemental Information 1 [file peerj-11-15774-s001.xlsx]

## Sheet: Sheet1
Code	Gender	Age	Differentiation	Clinical stage	TNM stage	Lymphatic metastases	Distant metastases	Invasion of mucous membranes	Tumor cite	COX2-cancer tissue	COX2-normal tissue	NUCB1-cancer tissue	NUCB1-normal tissue
1	Male	71	Medium differentiation	ⅡB	T4aN0M0	No	No	Yes	Left	8.2	11.4	4	0
2	Male	76	Medium differentiation	ⅢB	T3N1aM0	Yes	No	Yes	Left	7.6	0	4	0
3	Male	64	Medium differentiation	ⅢC	T4bN2aM0	Yes	No	Yes	Left	8	0	4.8	0
4	Male	63	Medium differentiation	Ⅳ	T4aN1aM1	Yes	Yes	Yes	Right	12	4	9.6	0.4
5	Male	74	Medium differentiation	ⅡB	T4aN0M0	No	No	Yes	Left	12	0	0	4.8
6	Male	74	Low differentiation	ⅢC	T3N2bM0	Yes	No	Yes	Left	12	1.6	6.4	5.6
7	Female	67	Medium differentiation	ⅢB	T3N1bM0	Yes	No	Yes	Left	0	12	0	0
8	Male	70	Medium differentiation	ⅢC	T4bN2aM0	Yes	No	Yes	Left	4	0	0	0
9	Female	65	Low differentiation	Ⅳ	T4bN0M1	Yes	Yes	Yes	Left	4.4	4	3.8	0
10	Male	72	Medium differentiation	ⅡA	T3N0M0	No	No	Yes	Left	4	1	0	0
11	Female	91	Medium differentiation	ⅡB	T4aN0M0	No	No	Yes	Left	1	1	0	0
12	Female	70	Medium differentiation	ⅢB	T3N1bM0	Yes	No	Yes	Left	0	0	0	0
13	Male	61	Medium differentiation	ⅢB	T4aN1cM0	Yes	No	Yes	Right	12	0	12	1.6
14	Female	84	Medium differentiation	Ⅰ	T2N0M0	No	No	No	Left	6.4	3.6	0	1.6
15	Female	74	Medium differentiation	Ⅰ	T2N0M0	No	No	No	Left	7.2	12	7.2	0
16	Male	78	Medium differentiation	Ⅰ	T2N0M0	No	No	No	Left	0.4	5.6	0	0
17	Female	67	Medium differentiation	ⅡA	T3N0M0	No	No	Yes	Right	9.8	7.8	5.6	4
18	Female	72	Low differentiation	ⅢC	T4aN2aM0	Yes	No	Yes	Right	12	0.4	10.4	0
19	Male	71	Medium differentiation	ⅢB	T3N2aM0	Yes	No	Yes	Right	6.4	1.6	5.6	0
20	Female	49	High differentiation	Ⅰ	T2N0M0	No	No	No	Left	5.6	12	4	0
21	Male	59	Low differentiation	ⅢC	T3N2bM0	Yes	No	Yes	Right	4	1.2	4	0
22	Female	76	Medium differentiation	ⅢB	T3N2aM0	Yes	No	Yes	Right	4	1.4	4.8	0
23	Male	73	Medium differentiation	ⅢA	T2N1aM0	Yes	No	No	Left	12	0	8	9.6
24	Male	52	Medium differentiation	IV	T3N1bM1	Yes	Yes	Yes	Right	11.4	12	5.6	4.8
25	Female	63	Medium differentiation	ⅢB	T3N1aM0	Yes	No	Yes	Right	0	3	4	0.8
26	Female	50	Low differentiation	ⅡA	T3N0M0	No	No	Yes	Right	11.2	0	4.8	4.2
27	Male	83	Medium differentiation	ⅢB	T3N1aM0	Yes	No	Yes	Left	0	5.6	3.8	0
28	Male	56	Medium differentiation	ⅡA	T3N0M0	No	No	Yes	Right	0	0	10.2	0
29	Female	54	Low differentiation	Ⅰ	T2N0M0	No	No	No	Left	7.8	0.4	9.6	6.2
30	Male	74	Medium differentiation	ⅢB	pT4aN1bM0	Yes	No	Yes	Right	0	0	12	4
31	Male	98	High differentiation	ⅢB	T3N1cM0	Yes	No	Yes	Left	6.8	0	9.8	0
32	Male	83	Medium differentiation	ⅢB	T3N1cM0	Yes	No	Yes	Left	12	0	8	7.2
33	Female	67	Medium differentiation	Ⅰ	T1N0M0	No	No	No	Left	6.8	0	12	0
34	Female	63	Medium differentiation	Ⅰ	T2N0M0	No	No	No	Left	0	4	0	0
35	Male	82	High differentiation	Ⅰ	T2N0M0	No	No	No	Left	9.6	0	9.6	0
36	Female	74	Medium differentiation	ⅡA	T3N0M0	No	No	Yes	Right	12	0	11.4	0
37	Male	67	Medium differentiation	ⅡA	T3N0M0	No	No	Yes	Left	9.6	0	7.2	0
38	Male	47	Medium differentiation	ⅢB	T3N1aM0	Yes	No	Yes	Left	7.2	0	4.4	4
39	Male	55	Medium differentiation	ⅣA	T3N0M1	No	Yes	Yes	Right	10.6	10.8	12	0
40	Male	45	High differentiation	ⅡB	T4aN0M0	No	No	Yes	Right	5.4	0.2	3.8	0
41	Female	76	Low differentiation	ⅢB	T3N2aM0	Yes	No	Yes	Right	0	4.2	0	2
42	Female	59	Low differentiation	ⅢB	T3N1bM0	Yes	No	Yes	Right	0	2.8	0	5.2
43	Male	48	Low differentiation	ⅢB	T3N2aM0	Yes	No	Yes	Left	0	8	0	0
44	Female	58	Medium differentiation	ⅡA	T3N0M0	No	No	Yes	Left	1.6	8	0.8	0
45	Male	75	Medium differentiation	ⅡA	T3N0M0	No	No	Yes	Left	10.4	0	6.4	0
46	Male	49	Low differentiation	ⅢC	T3N2bM0	Yes	No	Yes	Left	6.2	12	6.4	0
47	Male	65	Medium differentiation	ⅡA	T3N0M0	No	No	Yes	Left	12	0	7.2	0
48	Male	67	Medium differentiation	Ⅰ	T2N0M0	No	No	No	Left	5.8	0	0	0
49	Male	51	Low differentiation	Ⅰ	T2N0M0	No	No	No	Left	10	0	4.8	2
50	Female	62	Medium differentiation	ⅡA	T3N0M0	No	No	Yes	Right	0	0	0	0
51	Male	50	Medium differentiation	ⅡB	T4aN0M0	No	No	Yes	Left	1.4	0	4	0
52	Female	80	Medium differentiation	ⅢA	T2N1aM0	Yes	No	No	Left	7.2	0	4.8	0
53	Male	56	Medium differentiation	ⅢB	T4aN1cM0	Yes	No	Yes	Left	4	0	4	2.4
54	Male	65	Medium differentiation	ⅡA	T3N0M0	No	No	Yes	Left	0	0	0	0
55	Male	52	Medium differentiation	ⅡA	T3N0M0	No	No	Yes	Left	0	0	0	0
56	Male	68	Low differentiation	ⅢB	T3N1bM0	Yes	No	Yes	Left	4	0	4	0
